# Supplementary material
Source: publisher site journal article supplement (https://www.dovepress.com/article/311702)
Supplement: Supplementary file 1 [file get_supplementary_file.php]

**Supplemental Table 1**—Multilevel collapse of ≥2 levels for VOTE

|  | # of patients | Post-OP AHI (events/ hours) | AHI reduction ratio (%) | Success |
| --- | --- | --- | --- | --- |
| Pre-OP status |  |  |  |  |
| No collapse/partial | 24 | 20.4 ± 16.6 | 41.2 ± 31.9 | 8 (33.3) |
| Complete | 10 | 38.0 ± 24.8 | 36.8 ± 26.1 | 2 (20.0) |
| *P* value |  | 0.021* | 0.706 | 0.683 |
| Pre-OP status |  |  |  |  |
| No collapse | 19 | 20.3 ± 18.0 | 41.5 ± 35.0 | 7 (36.8) |
| Partial/ complete | 15 | 32.4 ± 22.3 | 37.9 ± 23.2 | 3 (20.0) |
| *P* value |  | 0.091 | 0.735 | 0.451 |
| Post-OP status |  |  |  |  |
| No collapse/partial | 31 | 24.7 ± 20.6 | 41.0 ± 30.0 | 9 (29.0) |
| Complete | 3 | 35.2 ± 23.0 | 28.5 ± 33.5 | 1 (33.3) |
| *P* value |  | 0.409 | 0.499 | 1.000 |
| Post-OP status |  |  |  |  |
| No collapse | 28 | 23.2 ± 19.5 | 43.4 ± 30.2 | 9 (32.1) |
| Partial/ complete | 6 | 36.8 ± 23.8 | 23.7 ± 25.3 | 1 (16.7) |
| *P* value |  | 0.147 | 0.147 | 0.644 |

Abbreviations: OP, operation; AHI, apnea–hypopnea index;

* *P* <0.05;

Data were presented as frequency (percentage) or mean ± standard deviation.

**Supplemental Table 2**—Multilevel collapse for the levels of velum and tongue base

|  | # of patients | Post-OP AHI (events/ hours) | AHI reduction ratio (%) | Success |
| --- | --- | --- | --- | --- |
| Pre-OP status |  |  |  |  |
| No collapse/partial | 29 | 22.1 ± 18.5 | 42.5 ± 30.2 | 9 (31.0) |
| Complete | 5 | 46.0 ± 22.2 | 24.8 ± 26.4 | 1 (20.0) |
| *P* value |  | 0.014* | 0.226 | 1.000 |
| Pre-OP status |  |  |  |  |
| No collapse | 26 | 22.5 ± 19.2 | 41.4 ± 31.6 | 8 (30.8) |
| Partial/ complete | 8 | 35.6 ± 23.1 | 35.0 ± 25.2 | 2 (25.0) |
| *P* value |  | 0.119 | 0.606 | 1.000 |
| Post-OP status |  |  |  |  |
| No collapse/partial | 34 | 25.6 ± 20.6 | 39.9 ± 30.0 | 10 (29.4) |
| Complete | 0 | NA | NA | 0 (0.0) |
| *P* value |  | NA | NA | NA |
| Post-OP status |  |  |  |  |
| No collapse | 34 | 25.6 ± 20.6 | 39.9 ± 30.0 | 10 (29.4) |
| Partial/ complete | 0 | NA | NA | 0 (0.0) |
| *P* value |  | NA | NA | NA |

Abbreviations: OP, operation; AHI, apnea–hypopnea index; NA, not applicable;

* *P* <0.05;

Data were presented as frequency (percentage) or mean ± standard deviation.
